# Supplementary material for: A novel route to fabricate a superhydrophobic surface on a copper substrate without additional low surface energy materials
Source: Royal Society of Chemistry journal article supplement (doi:10.1039/d3nj05737b), 2024-01-01
Supplement: d3nj05737b1.pdf [file d3nj05737b1.pdf]

Supplementary Materials

## A novel route to fabricate superhydrophobic surface on copper substrate without additional low surface energy materials

Fan Jiang<sup>\*a</sup>, Tongyu Song<sup>a</sup>, Hongyan Wu<sup>a</sup>, Xinye Yang<sup>a</sup>, Shaofu Li<sup>b</sup>, Maoqiao Xiang<sup>\*b</sup>

a, School of Chemistry and Materials Science, Nanjing University of Information Science & Technology, 210044, Nanjing, China

b, Institute of Process Engineering, Chinese Academy of Sciences, Beijing 100190, China.

### 1. Appearance of electrolyte system

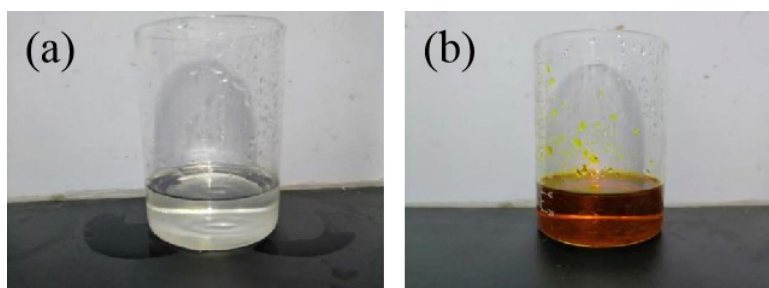

Fig. S1. Appearance of the deep eutectic solvent:  
(a) without  $\text{CuCl}_2 \cdot 2\text{H}_2\text{O}$ ; (b) with  $\text{CuCl}_2 \cdot 2\text{H}_2\text{O}$

After the addition of 0.2 M  $\text{CuCl}_2 \cdot 2\text{H}_2\text{O}$ , the color of the liquid changed from colorless to brown.

### 2. Wettability performance

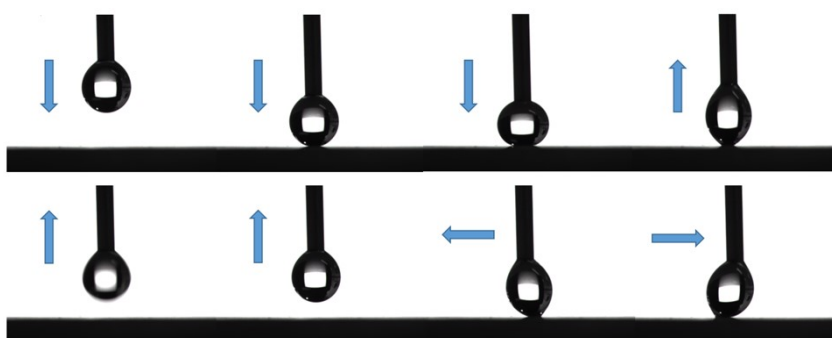

Fig. S2. The wettability test of copper coating after heat treatment

From the Fig. S2, it could be seen that the superhydrophobic sample had a low adhesion to the water droplet.

### 3. Chemical composition

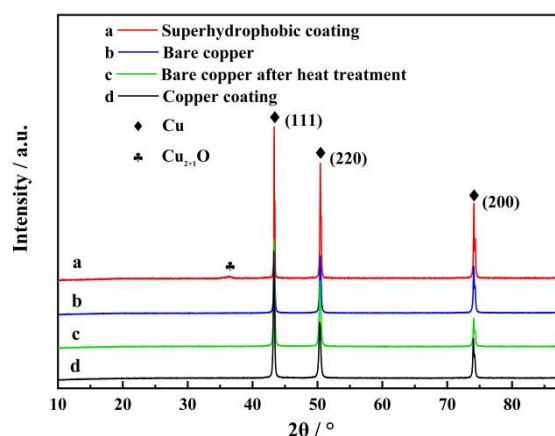

Fig. S3. XRD patterns of different samples

As can be seen from Fig. S3, the superhydrophobic sample was composed of copper and copper oxide. From the EDS analysis in Fig. S4, an increase in oxygen content and C/Cu value indicated the oxidation and adsorption of organic carbon were formed on copper surface after heat treatment. The peaks located at 284.6 eV, 285.5 eV and 288.3 eV in Fig.S4d were related to the binding energy of C-C, C-O and C=O, respectively. The peaks located at 944.1 eV and 946.4 eV in Fig.S4f were related to the binding energy of CuO and Cu<sub>2</sub>O, respectively.

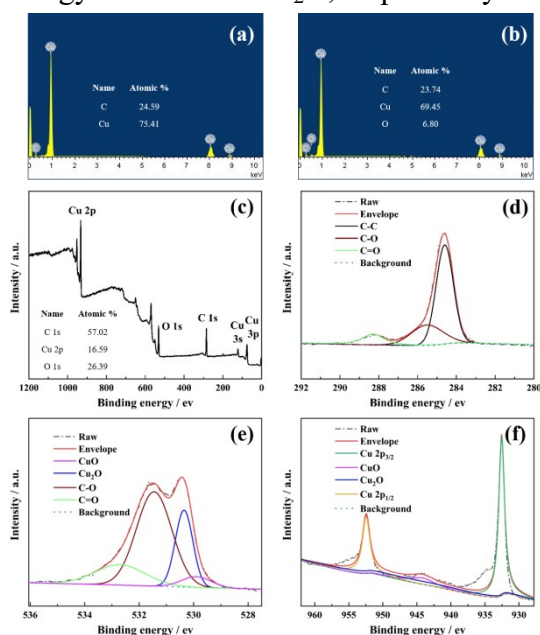

Fig. S4. EDS spectrum: region 1 (a), region 2 (b); XPS spectrum of the superhydrophobic coating: survey spectrum (c), C1s region (d), O1s region(e) and Cu2p region(f) .

### 4. Anti-corrosion analysis

Table S1 shows the corrosion potential ( $E_{corr}$ ) and current density ( $j_{corr}$ )

calculated from the potentiodynamic polarization curves in Fig.3a.

Table S1.  $E_{corr}$  and  $j_{corr}$  and corrosion rate (CR) of different samples

| Sample                                        | $E_{corr}/V$ | $j_{corr}/A \cdot cm^{-2}$ | CR/mm·a <sup>-1</sup> |
|-----------------------------------------------|--------------|----------------------------|-----------------------|
| Superhydrophobic coating                      | -0.18        | $4.11 \times 10^{-7}$      | 0.005                 |
| Bare copper                                   | -0.27        | $1.74 \times 10^{-6}$      | 0.020                 |
| Bare copper after heat treatment              | -0.31        | $3.04 \times 10^{-6}$      | 0.036                 |
| Copper coating                                | -0.34        | $5.59 \times 10^{-6}$      | 0.065                 |
| Superhydrophobic coating in<br>reference [15] | -0.23        | $4.28 \times 10^{-7}$      | 0.005                 |
| Superhydrophobic coating in<br>reference [16] | -0.23        | $4.08 \times 10^{-7}$      | 0.005                 |

Table S2. Parameters extracted from Nyquist plots using equivalent circuit modelling.

| Sample                              | $R_s/\Omega$<br>·cm <sup>2</sup> | CPEf                                                 |                       | $Cf/F \cdot c$<br>m <sup>2</sup> | $Rf/\Omega$<br>cm <sup>2</sup> | CPEdl                                                |                       | $C_{dl}/F \cdot cm^{-2}$ | $Rct/\Omega \cdot cm^2$ | $W, Y_0 / \Omega$<br>·s <sup>n</sup> ·cm <sup>-2</sup> |
|-------------------------------------|----------------------------------|------------------------------------------------------|-----------------------|----------------------------------|--------------------------------|------------------------------------------------------|-----------------------|--------------------------|-------------------------|--------------------------------------------------------|
|                                     |                                  | $Y1/\Omega$<br>·s <sup>n</sup> ·c<br>m <sup>-2</sup> | $n_1$                 |                                  |                                | $Y2/\Omega$<br>·s <sup>n</sup> ·c<br>m <sup>-2</sup> | $n_2$                 |                          |                         |                                                        |
| Superhydrophobic<br>coating         | 7.90                             | $4.03 \times 10^{-6}$                                | $8.45 \times 10^{-1}$ | $1.29 \times 10^{-6}$            | $4.96 \times 10^2$             |                                                      |                       | $4.63 \times 10^{-7}$    | $9.60 \times 10^4$      | $1.08 \times 10^{-4}$                                  |
| Bare copper                         | 8.35                             |                                                      |                       |                                  |                                | $1.72 \times 10^{-5}$                                | $8.73 \times 10^{-1}$ | $4.72 \times 10^{-6}$    | $1.11 \times 10^4$      | $7.52 \times 10^{-4}$                                  |
| Bare copper after<br>heat treatment | 7.16                             |                                                      |                       |                                  |                                | $2.03 \times 10^{-5}$                                | $8.66 \times 10^{-1}$ | $5.16 \times 10^{-6}$    | $9.23 \times 10^3$      | $1.04 \times 10^{-3}$                                  |
| Copper coating                      | 9.99                             |                                                      |                       |                                  |                                | $2.57 \times 10^{-5}$                                | $8.58 \times 10^{-1}$ | $6.56 \times 10^{-6}$    | $4.99 \times 10^3$      | $1.54 \times 10^{-3}$                                  |

where  $R_s$  is the the solution resistance, CPE refers to a constant phase element,

$C_f$  is the the capacitance value of the protection layer,  $Y_1$  is the constant of the  $CPE_f$  element,  $C_{dl}$  refers to the the capacitance value of the electric double layer,  $Y_2$  is the constant of the  $CPE_{dl}$  element,  $R_f$ ,  $R_{ct}$  and  $W$  correspond to the protection layer resistance, charge transfer resistance and Warburg impedance, respectively.

## 5. Mechanical stability

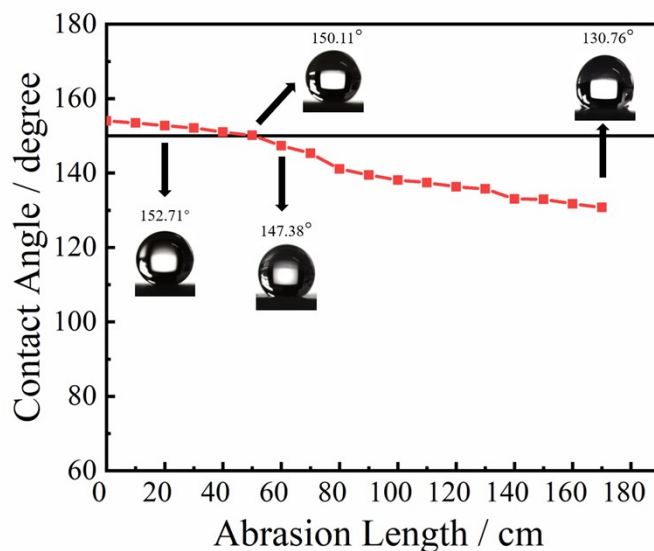

Fig. S5. The relationship between the abrasion length and the WCAs of the sample modified in 1 wt.% palmitic acid ethanol solution for 24 h.

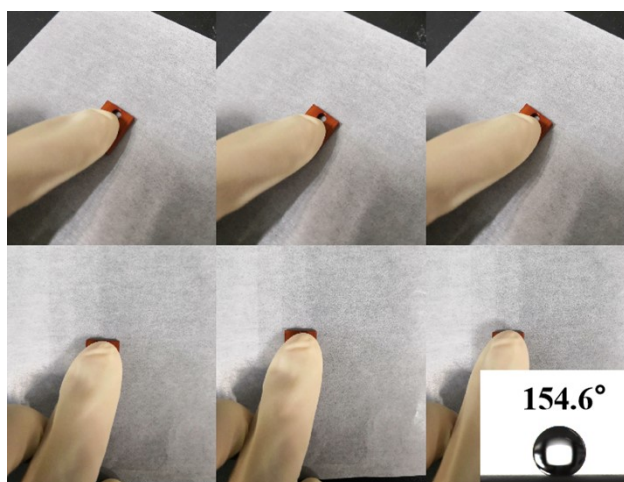

Fig. S6. Finger press test of superhydrophobic coating.

After sixth finger press, the superhydrophobic sample maintain a large WCA of

154.6°.

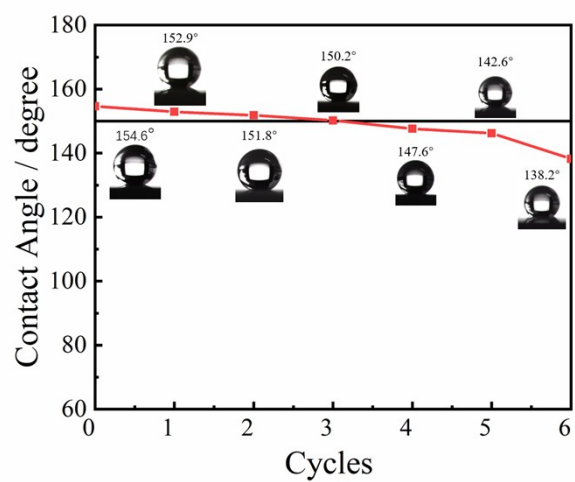

Fig. S7. The relationship between the tape pull cycles and the WCAs.
